# Supplementary material for: Percutaneous Microwave Ablation of Desmoid Fibromatosis
Source: PubMed Central journal article supplement — Korean J Radiol. 2021 Apr 23;22(6):944–50. doi: 10.3348/kjr.2020.0768 (PMC8154784; doi:10.3348/kjr.2020.0768), 2021-04-23
Supplement: kjr-22-944-s001.pdf [file kjr-22-944-s001.pdf]

SUPPLEMENT

Supplementary Table 1. Patients Characteristics

| Patient | Age, Years | Sex    | Location     | Previous Therapies           | Pre-Treatment Volume*, cm <sup>3</sup> | Number of Interventions | Ablation Scheme           | Proximity to the Skin, mm | Proximity to Nerves, mm | Post-Treatment MRI Date, M | Post-Treatment Volume, cm <sup>3</sup> ** | Volume Reduction, % | Pre- and Post-Treatment ECOG Grades |
|---------|------------|--------|--------------|------------------------------|----------------------------------------|-------------------------|---------------------------|---------------------------|-------------------------|----------------------------|-------------------------------------------|---------------------|-------------------------------------|
| 1       | 71         | Female | Leg          | Surgery                      | 69.3                                   | 1                       | 5 areas, 20 W, 1.5–3 m    | 7                         | Sciatic 1               | 3                          | 43.5                                      | 37.2                | 2; 1                                |
| 2       | 41         | Female | Gluteus      | Surgery                      | 92.9                                   | 1                       | 4 areas, 60 W, 5 m        | 22                        | Sciatic 62              | 4                          | 16.5                                      | 82.2                | 2; 1                                |
| 3       | 18         | Female | Thigh        | Surgery, RT                  | 303.1                                  | 2                       | 8 areas, 60 W, 3–10 m     | 2                         | Sciatic 13              | 2                          | 221.9                                     | 28.1                | 1; 0                                |
| 4       | 35         | Female | Gluteus      | Surgery, TAM, CP, VCR, ACT-D | 42.2                                   | 2                       | 8 areas, 20–40 W, 3 m     | 6                         | Sciatic 4               | 6                          | 0                                         | 100                 | 1; 1                                |
| 5       | 57         | Male   | Periscapular | NSAIDs                       | 693.6                                  | 2                       | 11 areas, 20–60 W, 3–10 m | 18                        | Brachial plexus 0       | 5                          | 261.6                                     | 62.3                | 2; 1                                |
| 6       | 30         | Male   | Thigh        | TAM                          | 289.7                                  | 1                       | 8 areas, 20 W, 3 m        | 12                        | Sciatic 0.5             | 5                          | 57.8                                      | 80                  | 2; 1                                |
| 7       | 33         | Female | Leg          | Surgery, TAM, CP, VCR, ACT-D | 129.5                                  | 1                       | 7 areas, 40–60 W, 5 m     | 1                         | Sciatic 0               | 1                          | 40.7                                      | 68.6                | 2; 1                                |
| 8       | 76         | Male   | Periscapular | NSAIDs                       | 291.1                                  | 1                       | 5 areas, 40–60 W, 5 m     | 19                        | Brachial plexus 5       | 6                          | 72.1                                      | 75.2                | 2; 1                                |
| 9       | 43         | Female | Thigh        | NSAIDs + TAM                 | 3.2                                    | 1                       | 1 area, 40 W, 3 m         | 6                         | Sciatic 40              | 2                          | 0                                         | 100                 | 1; 0                                |

\*Pre- and post-treatment volumes are the result of the mean value between the volumes calculated by both radiologists independently. ACT-D = dactinomycin, CP = cyclophosphamide, ECOG = Eastern Cooperative Oncology Group, m = minutes, NSAID = nonsteroidal anti-inflammatory drugs, RT = radiotherapy, TAM = tamoxifen, VCR = vincristine, W= watt
