# Supplementary material for: Percutaneous Microwave Ablation of Desmoid Fibromatosis
Source: PubMed Central journal article supplement — Korean J Radiol. 2021 Apr 23;22(6):944–50. doi: 10.3348/kjr.2020.0768 (PMC8154784; doi:10.3348/kjr.2020.0768), 2021-04-23
Supplement: kjr-22-944-s002.pdf [file kjr-22-944-s002.pdf]

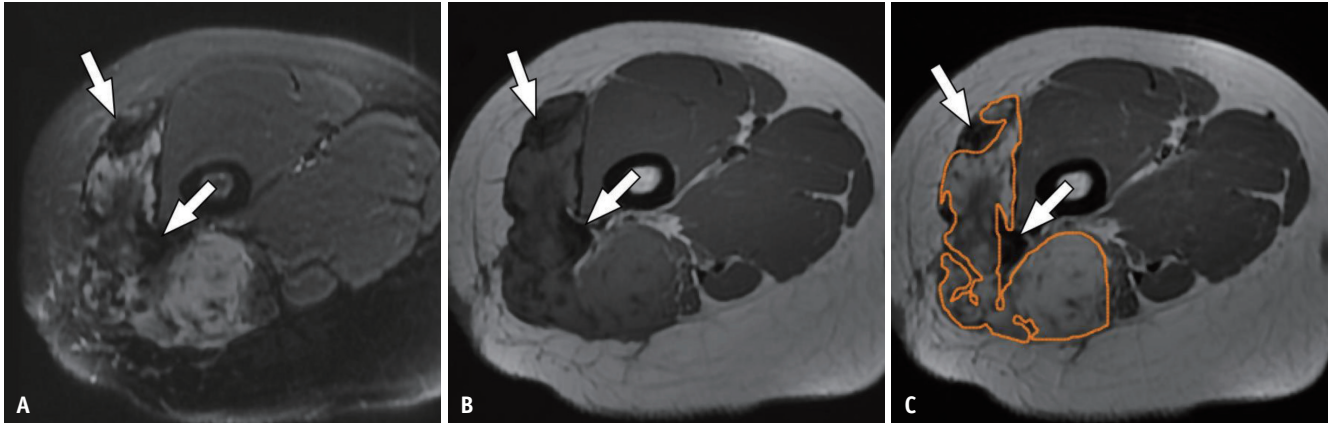

**Supplementary Fig. 1.** Fat-suppressed T2-weighted (A), T1-weighted (B) and contrast-enhanced T1-weighted (C) magnetic resonance images of an 18-year-old female with desmoid tumor in the right thigh areas of relatively lower intensity than that of muscle can be seen on T2 and T1-weighted sequences without contrast enhancement within the tumor, which were considered to be the foci of inactive fibromatosis (arrows) and were excluded from the calculation of the tumor volume.
