# Supplementary material for: Percutaneous Microwave Ablation of Desmoid Fibromatosis
Source: PubMed Central journal article supplement — Korean J Radiol. 2021 Apr 23;22(6):944–50. doi: 10.3348/kjr.2020.0768 (PMC8154784; doi:10.3348/kjr.2020.0768), 2021-04-23
Supplement: kjr-22-944-s003.pdf [file kjr-22-944-s003.pdf]

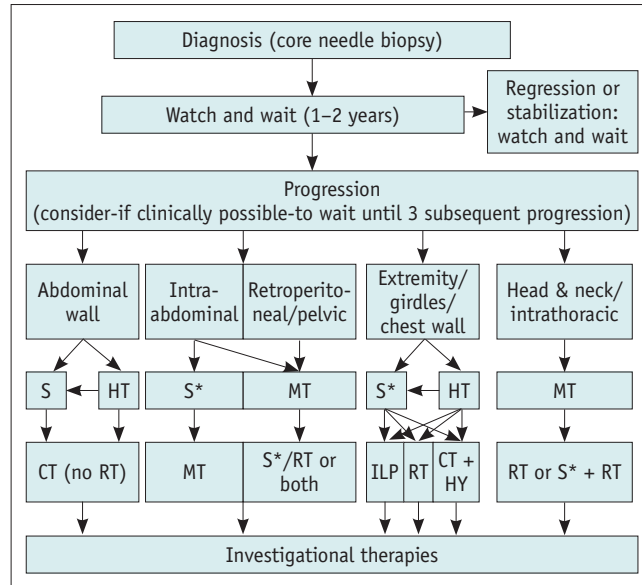

**Supplementary Fig. 2. Consensus algorithm.**

CT = chemotherapy, HT = hormonal therapy, HY = hyperthermia, ILP = isolated limb perfusion, MT = medical therapy, RT = radiotherapy, S = surgery, S\* = surgery is an option if morbidity is limited
