# Supplementary material for: Percutaneous Microwave Ablation of Desmoid Fibromatosis
Source: PubMed Central journal article supplement — Korean J Radiol. 2021 Apr 23;22(6):944–50. doi: 10.3348/kjr.2020.0768 (PMC8154784; doi:10.3348/kjr.2020.0768), 2021-04-23
Supplement: kjr-22-944-s004.pdf [file kjr-22-944-s004.pdf]

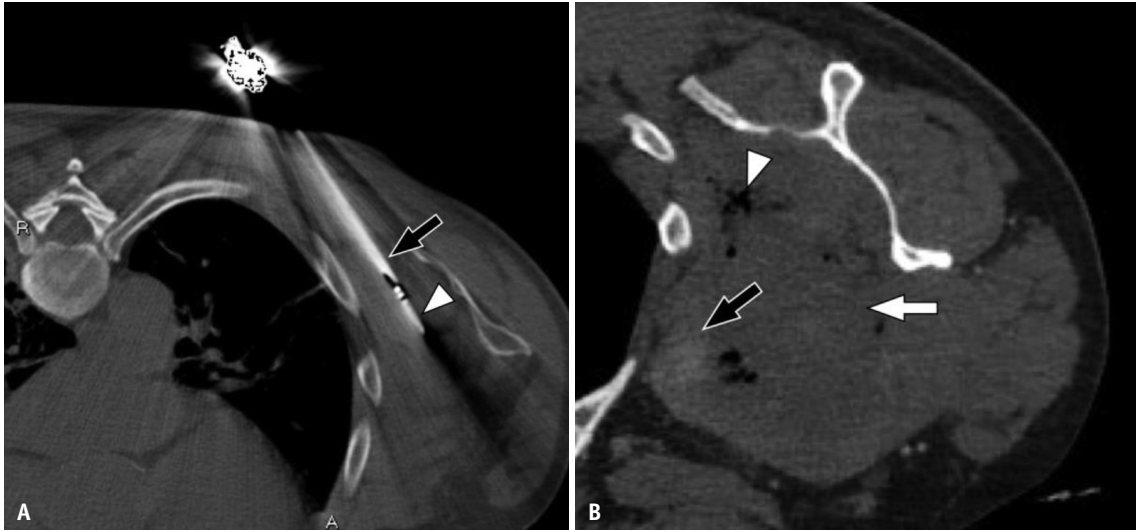

**Supplementary Fig. 3. Ablation technique and outcome in a 76-year-old male with desmoid tumor of the periscapular region.**  
**A.** Axial CT image shows the location of the vertebroplasty needle used as an introducer (arrow) and the microwave probe (arrowhead).  
**B.** Gas bubbles (arrowhead) and hematoma (black arrow) can be seen on the control CT after tumor ablation (white arrow). CT = computed tomography
